# Supplementary material for: Gold and silver nanoparticle interactions with human proteins: impact and implications in biocorona formation
Source: Royal Society of Chemistry journal article supplement (doi:10.1039/c4tb01926a), 2015-01-01
Supplement: c4tb01926a1.pdf [file c4tb01926a1.pdf]

## Supplementary Information

### **Gold and silver nanoparticle interactions with human proteins: Impact and implications in biocorona formation**

A. Sasidharan<sup>a</sup>, J.E.Riviere<sup>a,b</sup>, N. A. Monteiro-Riviere<sup>a\*</sup>,

<sup>a</sup>Nanotechnology Innovation Center of Kansas State,

<sup>b</sup>Institute of Computational Comparative Medicine,

Kansas State University, Manhattan, Kansas, United States

\* Corresponding author. Tel: +1-785-532-4367

E-mail address: nmonteiro@ksu.edu

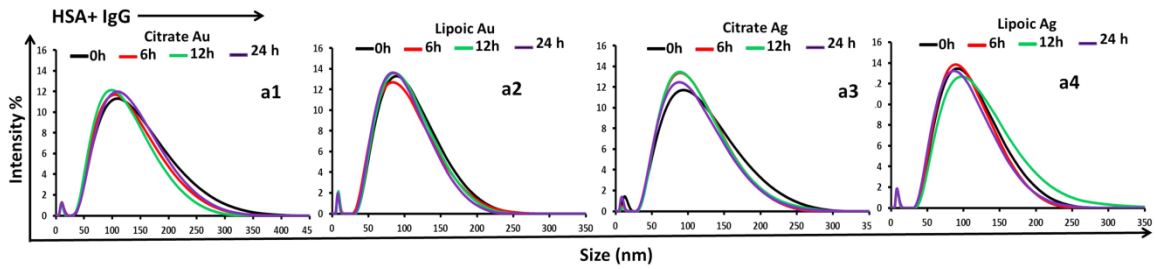

**Supplementary Figure S1.** Time dependent size distribution profiling of HSA + IgG corona over (a1) citrate-Au, (a2) lipoic-Au, (a3) citrate-Ag and (a4) lipoic-Ag

**Supplementary Table S1.** Time dependent zeta potential analysis of NP in PBS.

| Time (h) | Gold (mV)   |             | Silver (mV) |             |
|----------|-------------|-------------|-------------|-------------|
|          | Citrate     | Lipoic      | Citrate     | Lipoic      |
| 0        | -11.2 ± 3.4 | -19.8 ± 2.4 | -25.9 ± 1.9 | -33.4 ± 3.1 |
| 6        | -12.7 ± 2.6 | -15.7 ± 2.1 | -21.4 ± 2.6 | -30.2 ± 2.8 |
| 12       | -11.6 ± 3.7 | -13.8 ± 3.8 | -21.6 ± 2.5 | -29.1 ± 4.0 |
| 24       | -10.9 ± 2.8 | -12.4 ± 4.1 | -17.3 ± 3.3 | -20.1 ± 3.6 |

**Supplementary Table S2.** Time dependent zeta potential analysis of proteins in PBS.

| Time (h) | HSA (mV)    | IgG (mV)   | Fibrinogen (mV) |
|----------|-------------|------------|-----------------|
| 0        | -12.8 ± 1.4 | 5.50 ± 2.2 | -5.51 ± 1.2     |
| 6        | -12.2 ± 3.1 | 4.48 ± 1.8 | -5.30 ± 2.6     |
| 12       | -12.2 ± 2.0 | 4.31 ± 2.5 | -4.26 ± 3.1     |
| 24       | -11.8 ± 2.6 | 4.99 ± 2.4 | -4.86 ± 1.9     |

**Supplementary Table S3.** Time dependent zeta potential analysis of NP-fibrinogen corona.

| Time (h) | Citrate-Au-Fibrinogen (mV) | Lipoic-Au-Fibrinogen (mV) | Citrate-Ag-Fibrinogen (mV) | Lipoic-Ag-Fibrinogen (mV) |
|----------|----------------------------|---------------------------|----------------------------|---------------------------|
| 0        | -4.30 ± 0.38               | -4.56 ± 1.2               | -4.78 ± 1.3                | -4.43 ± 0.8               |
| 6        | -4.04 ± 1.03               | -4.14 ± 1.6               | -4.16 ± 1.1                | -4.11 ± 1.3               |
| 12       | -3.06 ± 0.4                | -3.27 ± 0.89              | -3.65 ± 1.6                | -3.94 ± 1.1               |
| 24       | -3.07 ± 0.19               | -3.19 ± 1.5               | -3.1 ± 1.7                 | -3.22 ± 1.0               |

**Supplementary Table S4.** Time dependent zeta potential analysis of NP-HSA + fibrinogen corona.

| Time (h) | Citrate-Au-HSA+ Fibrinogen (mV) | Lipoic-Au-HSA+ Fibrinogen (mV) | Citrate-Ag-HSA + Fibrinogen (mV) | Lipoic-Ag-HSA + Fibrinogen (mV) |
|----------|---------------------------------|--------------------------------|----------------------------------|---------------------------------|
| 0        | -2.97 ± 0.8                     | -3.11 ± 0.9                    | -3.92 ± 0.12                     | -3.23 ± 1.21                    |
| 6        | -2.56 ± 1.2                     | -3.03 ± 1.2                    | -3.99 ± 1.1                      | -3.71 ± 0.9                     |
| 12       | -2.23 ± 0.5                     | -3.12 ± 0.3                    | -3.47 ± 2.2                      | -3.24 ± 1.4                     |
| 24       | -2.83 ± 1.3                     | -3.04 ± 1.4                    | -2.6 ± 0.32                      | -2.72 ± 0.2                     |

**Supplementary Table S5.** Time dependent zeta potential analysis of NP-HSA + IgG + fibrinogen corona.

| Time (h) | Citrate-Au-HSA + IgG + Fibrinogen (mV) | Lipoic-Au-HSA+ IgG + Fibrinogen (mV) | Citrate-Ag-HSA + IgG + Fibrinogen (mV) | Lipoic-Ag-HSA + IgG + Fibrinogen (mV) |
|----------|----------------------------------------|--------------------------------------|----------------------------------------|---------------------------------------|
| 0        | -3.09 ± 1.6                            | -4.12 ± 2.1                          | -3.43 ± 1.6                            | -3.98 ± 0.9                           |
| 6        | -3.45 ± 1.8                            | -4.22 ± 1.8                          | -3.12 ± 1.5                            | -4.08 ± 0.8                           |
| 12       | -3.03 ± 1.4                            | -3.98 ± 1.3                          | -3.23 ± 1.3                            | -3.69 ± 1.2                           |
| 24       | -3.12 ± 0.8                            | -3.64 ± 1.3                          | -2.94 ± 1.0                            | -3.68 ± 1.4                           |

**Supplementary Table S6.** Time dependent zeta potential analysis of NP-HSA + IgG corona.

| Time (h) | Citrate-Au-HSA+ IgG (mV) | Lipoic-Au-HSA+ IgG (mV) | Citrate-Ag-HSA + IgG (mV) | Lipoic-Ag-HSA + IgG (mV) |
|----------|--------------------------|-------------------------|---------------------------|--------------------------|
| 0        | -4.01 ± 0.9              | -4.98 ± 1.3             | -3.67 ± 1.0               | -3.89 ± 1.3              |
| 6        | -3.32 ± 1.3              | -4.86 ± 0.8             | -3.42 ± 1.3               | -4.04 ± 1.7              |
| 12       | -3.89 ± 1.5              | -4.51 ± 1.6             | -3.68 ± 0.7               | -3.78 ± 1.2              |
| 24       | -3.56 ± 1.1              | -4.21 ± 1.4             | -2.45 ± 1.7               | -3.80 ± 1.1              |
